# Supplementary material for: Recombination Pattern Characterization via Simulation Using Different Maize Populations
Source: MDPI journal article supplement (doi:10.3390/ijms21062222), 2020-03-23
Supplement: s1 [file s1]

## Supplementary Materials

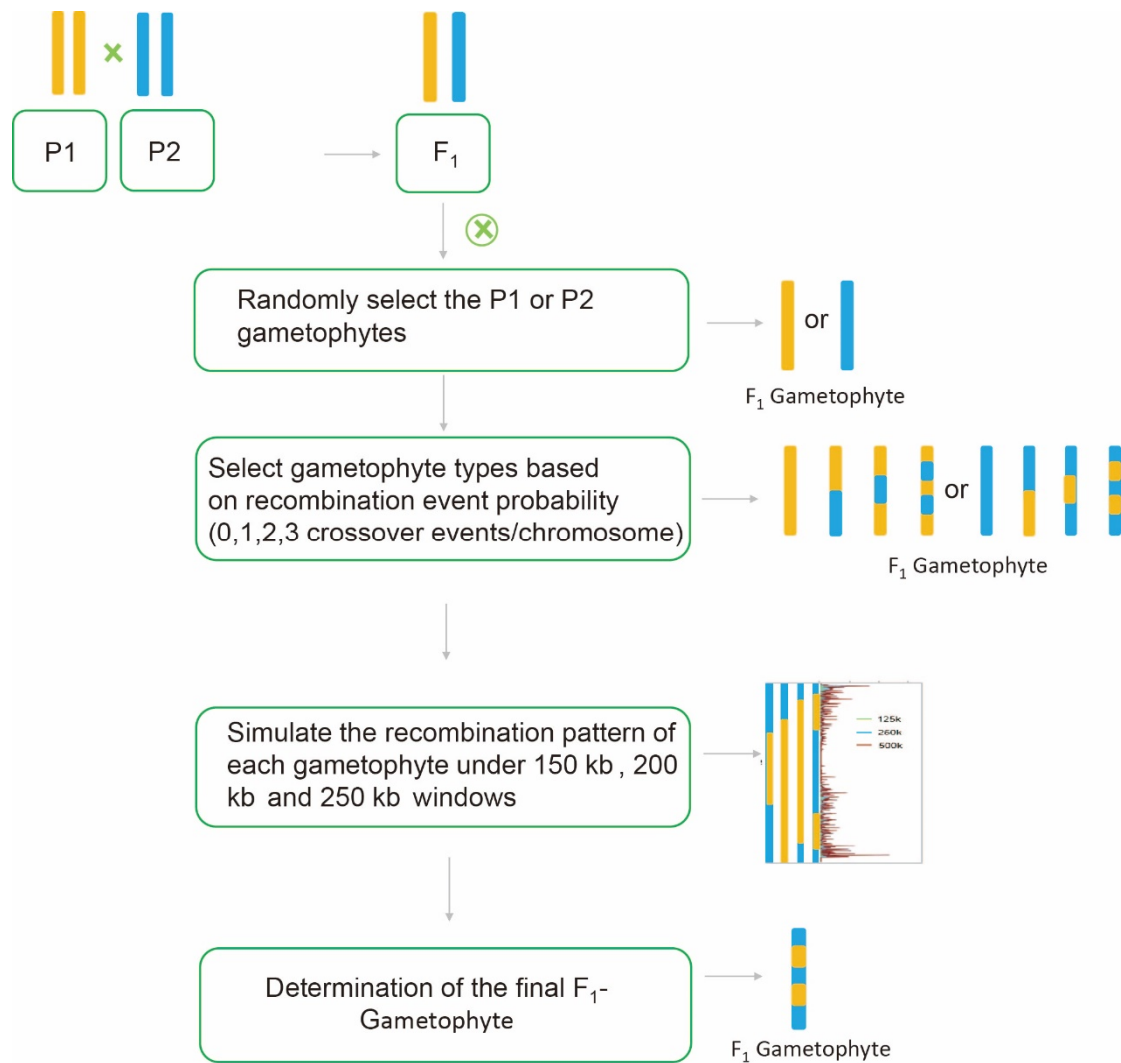

**Figure S1.** Overview of the recombination pattern estimation process. Assessment of the recombination process using the parental F<sub>1</sub>-DH map and IBM genetic linkage map. First, two pure parental lines were crossed to generate an F<sub>1</sub>, and P1 or P2 gametophytes were randomly selected based on recombination probability to estimate the number of recombination events per chromosome in the F<sub>1</sub>-DH population. We then predicted the recombination rate of each location based on the IBM population. Finally, the recombination pattern of each subsequent generation was simulated by an integrated analysis of the two recombination parameters.

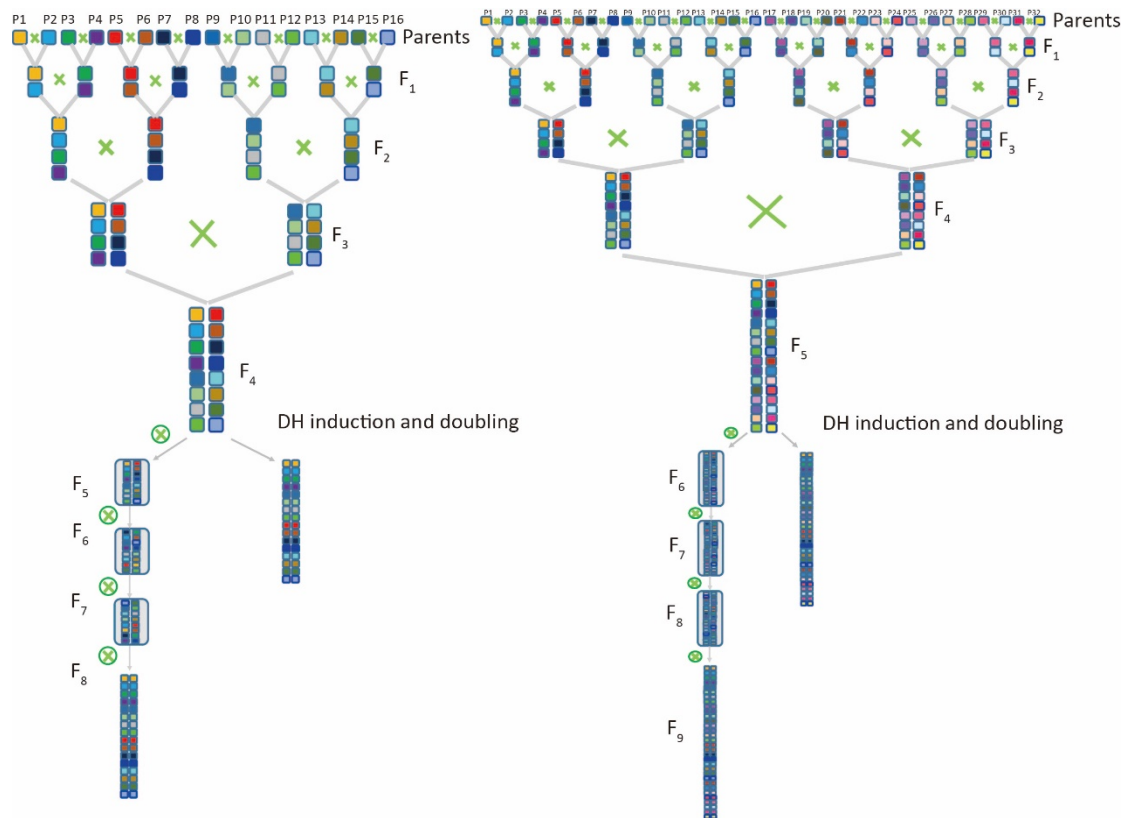

**Figure S2.** Construction of the 16- and 32-parent MAGIC populations by DH induction and CS. The construction procedure of the 16- and 32-parent MAGIC populations was similar to that described for the eight-parent MAGIC population. For 16- and 32-parent DH MAGIC populations, the parents were crossed to F<sub>4</sub> and F<sub>5</sub>, respectively, and the pure lines were derived by DH induction. For 16- and 32-parent CS MAGIC populations, the parents were crossed to F<sub>4</sub> and F<sub>5</sub>, respectively, and continuously self-crossed to obtain the pure lines.

**Table S1.** Recombination rate variation across all chromosomes under 125 kb, 250 kb and 500 kb windows based on the IBM population.

| Chr     | 125 kb |      |       | 250 kb |      |      | 500 kb |      |      |
|---------|--------|------|-------|--------|------|------|--------|------|------|
|         | Min    | Max  | N     | Min    | Max  | N    | Min    | Max  | N    |
| Chr. 1  | 0      | 5.9  | 2456  | 0      | 5.9  | 1228 | 0      | 7.7  | 614  |
| Chr. 2  | 0      | 4.6  | 1952  | 0      | 4.6  | 976  | 0      | 5.1  | 488  |
| Chr. 3  | 0      | 7.2  | 1888  | 0      | 8.1  | 944  | 0      | 8.2  | 472  |
| Chr. 4  | 0      | 4.4  | 1976  | 0      | 7.2  | 988  | 0      | 10.4 | 494  |
| Chr. 5  | 0      | 10.2 | 1792  | 0      | 10.2 | 896  | 0      | 10.2 | 448  |
| Chr. 6  | 0      | 6.3  | 1392  | 0      | 6.4  | 696  | 0      | 7.4  | 348  |
| Chr. 7  | 0      | 12.1 | 1456  | 0      | 12.1 | 728  | 0      | 12.1 | 364  |
| Chr. 8  | 0      | 9.5  | 1448  | 0      | 9.5  | 724  | 0      | 10.1 | 362  |
| Chr. 9  | 0      | 4.2  | 1280  | 0      | 4.9  | 640  | 0      | 6.5  | 320  |
| Chr. 10 | 0      | 5.1  | 1208  | 0      | 5.9  | 604  | 0      | 9.3  | 302  |
| Total   | 0      | 12.1 | 16848 | 0      | 12.1 | 8424 | 0      | 12.1 | 4212 |

IBM, intermated B73 and Mo17; N, the total number of recombination bins across all chromosomes; Min and Max represent the minimum and maximum recombination rate of each chromosome, respectively.

**Table S2.** Estimation of the number of recombination events and recombinant fragment size in DH and RIL populations of different generations.

| Generation | Population Type    | Number of<br>Recombination<br>Events<br>(per chromosome) | Recombination<br>Fragment Length<br>(Mb) | Total Number of<br>Recombination<br>Bins |
|------------|--------------------|----------------------------------------------------------|------------------------------------------|------------------------------------------|
| 2          | F <sub>1</sub> -DH | 14                                                       | 1.66                                     | 1367                                     |
| 3          | F <sub>2</sub> -DH | 21                                                       | 1.43                                     | 1619                                     |
| 4          | F <sub>3</sub> -DH | 25                                                       | 1.32                                     | 1760                                     |
| 5          | F <sub>4</sub> -DH | 26                                                       | 1.31                                     | 1779                                     |
| 6          | F <sub>5</sub> -DH | 26                                                       | 1.28                                     | 1815                                     |
| 7          | RIL                | 27                                                       | 1.26                                     | 1858                                     |

Data were obtained under the 125 kb window. Recombination bin denotes block with no recombination in the tested population. Two hundred lines of each population were analyzed.

**Table S3.** Estimation of the number of recombination events and recombinant fragment size in simulated MAGIC populations derived by the DH induction and continuous self-crossing.

| Population Type | Generation | Number of<br>Recombination<br>Events<br>(per chromosome) | Recombination<br>Fragment Length<br>(Mb) | Total number of<br>Recombination<br>Bin |
|-----------------|------------|----------------------------------------------------------|------------------------------------------|-----------------------------------------|
| 8-parent DH     | 4          | 42                                                       | 1.12                                     | 2122                                    |
| 16-parent DH    | 5          | 56                                                       | 1.04                                     | 2289                                    |
| 32-parent DH    | 6          | 69                                                       | 0.99                                     | 2433                                    |
| 8-parent RIL    | 8          | 55                                                       | 1.03                                     | 2314                                    |
| 16-parent RIL   | 9          | 69                                                       | 0.99                                     | 2431                                    |
| 32-parent RIL   | 10         | 82                                                       | 0.96                                     | 2516                                    |

Data were obtained under the 125 kb window. Recombination bin denotes blocks with no recombination in the tested population. Two hundred lines of each population were analyzed.
